# Supplementary material
Source: PubMed Central journal article supplement (PMC5033832)
Supplement: jciinsight-1-86698-s001.pdf [file jciinsight-1-86698-s001.pdf]

## Supplementary Data

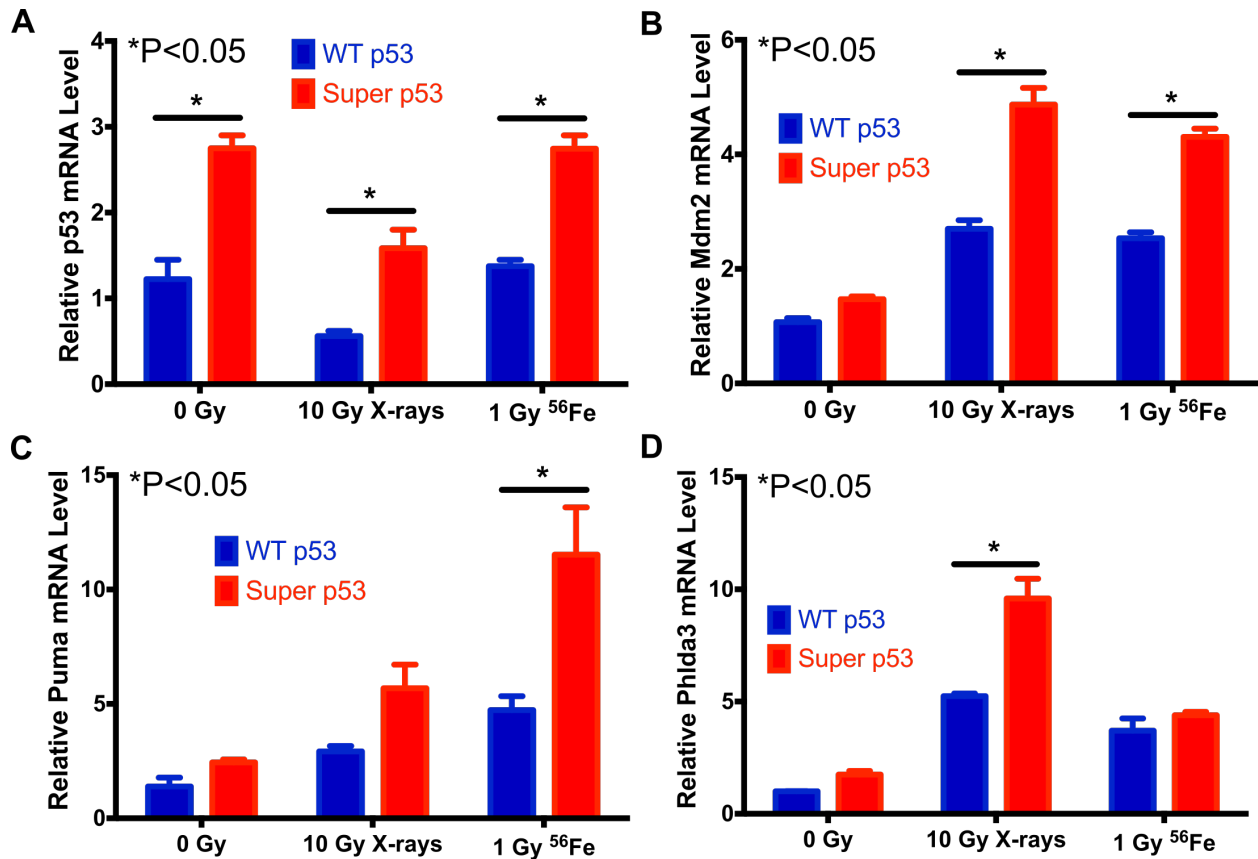

**Supplementary Figure 1.** *Super p53* mice have increased expression of *p53* target genes following radiation exposure. Relative mRNA levels of (A) *p53*, (B) *Mdm2*, (C) *Puma*, and (D) *Phlda3* in the lungs of *wild-type p53* and *super p53* mice measured by qPCR four hours following exposure to no irradiation, 10 Gy X-rays, or 1 Gy <sup>56</sup>Fe (n=2). Data represent mean plus SEM.

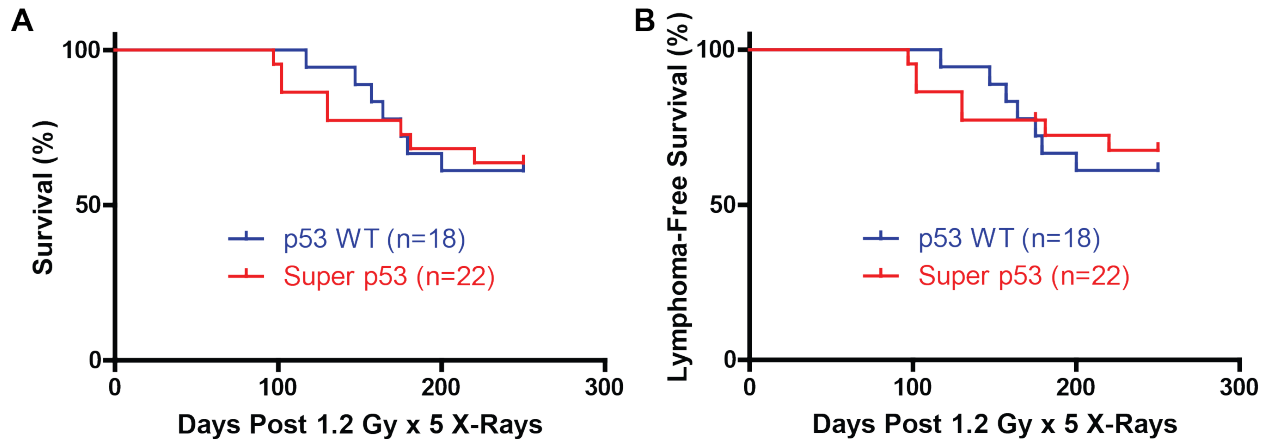

**Supplementary Figure 2.** An extra copy of *p53* does not protect mice from radiation-induced lymphomas. **(A)** Overall survival and **(B)** lymphoma-free survival in *WT p53* and *super p53* mice following exposure to five daily fractions of 1.2 Gy X-Rays. Each replicate represents one mouse.

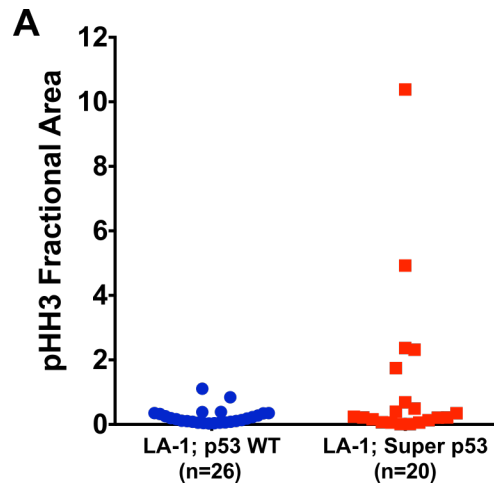

**Supplementary Figure 3.** An extra copy of p53 does not affect the proportion of lung adenoma cells in mitosis. **(A)** Quantification of the mitosis marker phospho-histone H3 (pHH3) in lung tumors from *LA-1; WT p53* and *LA-1; super p53* mice. Each symbol represents one tumor.

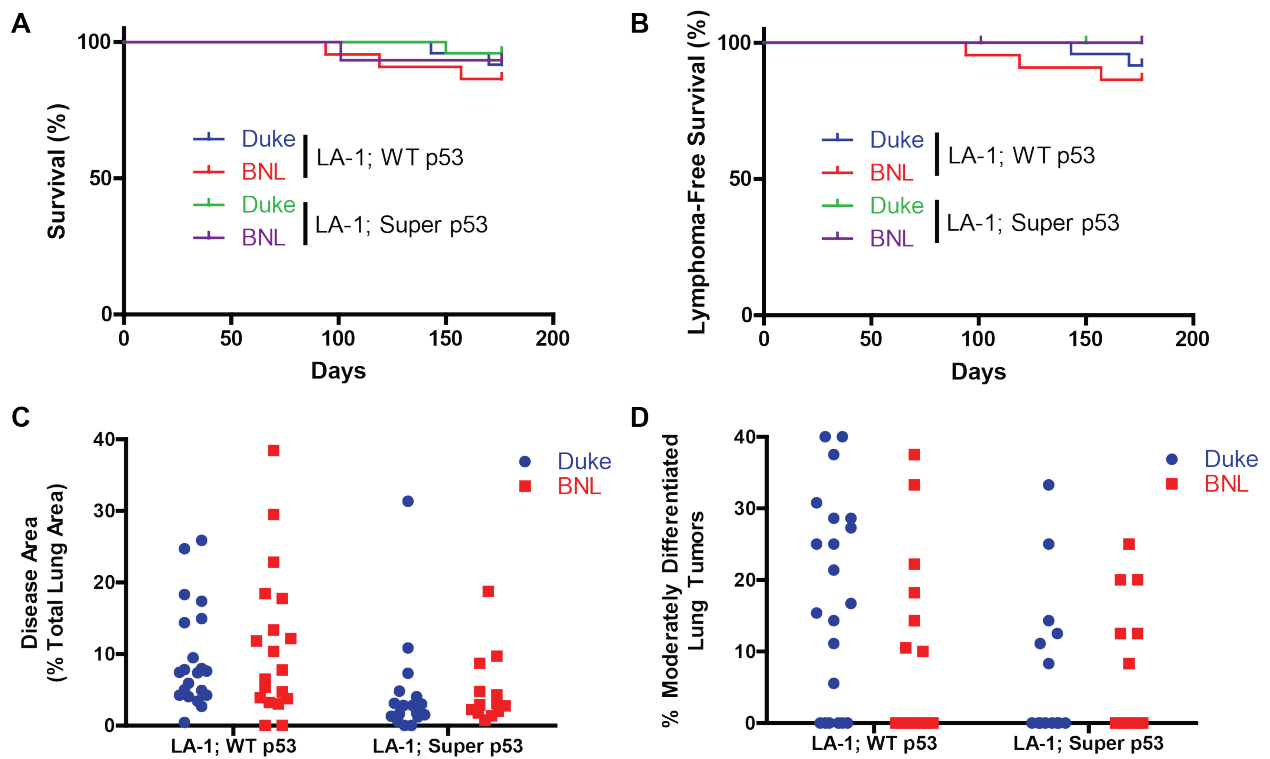

**Supplementary Figure 4.** Shipping mice to Brookhaven National Laboratory (BNL) did not affect tumor development in *LA-1* mice. **(A)** Overall survival, **(B)** lymphoma-free survival (n=15-24), **(C)** lung tumor burden, and **(D)** lung tumor grade (n=13-21) in unirradiated *LA-1; WT p53* and *LA-1; super p53* mice maintained at Duke University or shipped to BNL. Each replicate represents one mouse.

| <b>Treatment</b>                                        | <b>No Irradiation</b>   |                            | <b>1.2 Gy x 5 X-rays</b> |                            | <b>0.2 Gy x 5 Fe</b>    |                            |
|---------------------------------------------------------|-------------------------|----------------------------|--------------------------|----------------------------|-------------------------|----------------------------|
| <b>Genotype</b>                                         | <b>LA-1;<br/>WT p53</b> | <b>LA-1;<br/>Super p53</b> | <b>LA-1;<br/>WT p53</b>  | <b>LA-1;<br/>Super p53</b> | <b>LA-1;<br/>WT p53</b> | <b>LA-1;<br/>Super p53</b> |
| <b>Total</b>                                            | 46                      | 39                         | 42                       | 42                         | 53                      | 40                         |
| <b>Age at Irradiation (Days)</b>                        | 66 ± 13                 | 71 ± 17                    | 61 ± 12                  | 61 ± 13                    | 64 ± 17                 | 63 ± 19                    |
| <b>Age at Euthanasia for Lung Tumor Analysis (Days)</b> | 248 ± 15                | 251 ± 16                   | 245 ± 14                 | 240 ± 16                   | 248 ± 18                | 248 ± 19                   |
| <b>Lymphomas</b>                                        | 5                       | 0                          | 20                       | 18                         | 11                      | 5                          |
| <b>Papillomas</b>                                       | 0                       | 1                          | 0                        | 0                          | 1                       | 1                          |
| <b>Pneumonia</b>                                        | 0                       | 0                          | 0                        | 0                          | 1                       | 0                          |
| <b>Rectal Prolapse</b>                                  | 0                       | 0                          | 0                        | 0                          | 0                       | 1                          |

**Supplementary Table 1.** Characteristics of experimental mice.

| Treatment   | No Irradiation  |                    | 1.2 Gy x 5 X-rays |                    | 0.2 Gy x 5 Fe   |                    |
|-------------|-----------------|--------------------|-------------------|--------------------|-----------------|--------------------|
| Genotype    | LA-1;<br>WT p53 | LA-1;<br>Super p53 | LA-1;<br>WT p53   | LA-1;<br>Super p53 | LA-1;<br>WT p53 | LA-1;<br>Super p53 |
| Lymphomas   | 0/1             | N/A                | 0/4               | 0/4                | 0/4             | 0/4                |
| Lung Tumors | 0/5             | 0/5                | 0/4               | 0/5                | 0/4             | 0/5                |

**Supplementary Table 2.** *p53* mutations in tumors.

Number of tumors with *p53* mutations displayed over number of tumors sequenced for each genotype, treatment, and tumor type. No mutations were observed. N/A = no tumors were available for sequencing.
